# Supplementary material
Source: PubMed Central journal article supplement (PMC4193535)

| Protein | Yield (mg) | S <sub>0.5</sub> (mmol/L) | Hill (nH) | <sup>ATP</sup> K <sub>m</sub><br>(mmol/L) | K <sub>cat</sub> a (s <sup>-1</sup> ) | K <sub>cat</sub> b (s <sup>-1</sup> ) | RAI      | Predicted GSIS threshold<br>for heterozygous carriers<br>(mg/dl (mmol/L)) |
|---------|------------|---------------------------|-----------|-------------------------------------------|---------------------------------------|---------------------------------------|----------|---------------------------------------------------------------------------|
| WT      | 31.25      | 7.98±0.16                 | 1.58±0.02 | 0.51±0.01                                 | 61.47±0.32                            | 49.50±0.56                            | 1.00     | 90 (5.0)                                                                  |
| R43P    | 3.41       | 222.38±2.43               | 1.59±0.01 | 0.35±0.01                                 | 7.09±0.05                             | 7.23±0.08                             | 0.000005 | 129.6 (7.2)                                                               |
| T206M** | 5.07       | N/A                       | N/A       | N/A                                       | N/A                                   | N/A                                   | N/A      | N/A                                                                       |

**Supplemental Table 1.** Kinetic characterization of mutant GCK enzymes. Results are based on the kinetic analysis of one preparation of human wild type and mutant GST-GCK proteins. Glucose affinity (S<sub>0.5</sub>), Hill number (nH), and turnover number (K<sub>cat</sub>) values were determined in the presence of 0-100 mmol/L glucose (WT-GCK) or 0-1000mmol/L glucose (R43P- and T206M-GCK). Affinity for ATP (<sup>ATP</sup>K<sub>m</sub>) was determined in the presence 0-5mmol/L of this substrate. K<sub>cat</sub> a values were determined from glucose S<sub>0.5</sub> assays, and K<sub>cat</sub> b values were determined from <sup>ATP</sup>K<sub>m</sub> assays. Relative activity indices (RAI) were calculated for each enzyme using the equation first described by Christesen et al which normalizes to a blood glucose of 90 mg/dl (5mmol/L) (K<sub>cat</sub> values were taken from the glucose S<sub>0.5</sub> assay) (1). Data are presented as mean ±SEM. Glucose stimulated insulin secretion (GSIS) thresholds were calculated using the equation described by Gloyn et al (2). \*\*As data were not quantifiable for this mutant protein a GSIS threshold could not be predicted. N/A = data unobtainable as mutation resulted in a protein with such poor affinity for glucose that its functional parameters could not be calculated.

**Supplemental Figure 1:** Algorithm illustrating the systematic approach followed to investigate other family members with diabetes following identification of the p.T206M mutation in *GCK* and diagnosis of GCK-MODY in II-2.

**Supplemental Figure 2.** Ribbon model of the closed (glucose-bound) form of human GCK illustrating each of the 2 missense mutations. Glucose is indicated in stick form in the centre of the active site.

## **References:**

- 1. Christesen, H.B., Jacobsen, B.B., Odili, S., Buettger, C., Cuesta-Munoz, A., Hansen, T., Brusgaard, K., Massa, O., Magnuson, M.A., Shiota, C. et al.** 2002 The second activating glucokinase mutation (A456V): implications for glucose homeostasis and diabetes therapy. *Diabetes*, 51, 1240-1246.
- 2. Gloyn AL, Odili S, Buettger C, Njolstad PR, Shiota C, Magnuson MA, Matschinsky FM** 2004 Glucokinase and the Regulation of Blood Sugar. In: Matschinsky FM, Magnuson MA eds. *Glucokinase and Glycaemic Disease: From Basics to Novel Therapeutics*. Basel: Karger; 92-109

**5 Family members  
(I2, II4, II6, III1, III4)**

**Case history-Clinical Characteristics**  
1. age and presentation at diagnosis  
2. initial and current treatment  
3. previous DKA  
4. any diabetic complications

**Consistent with:**

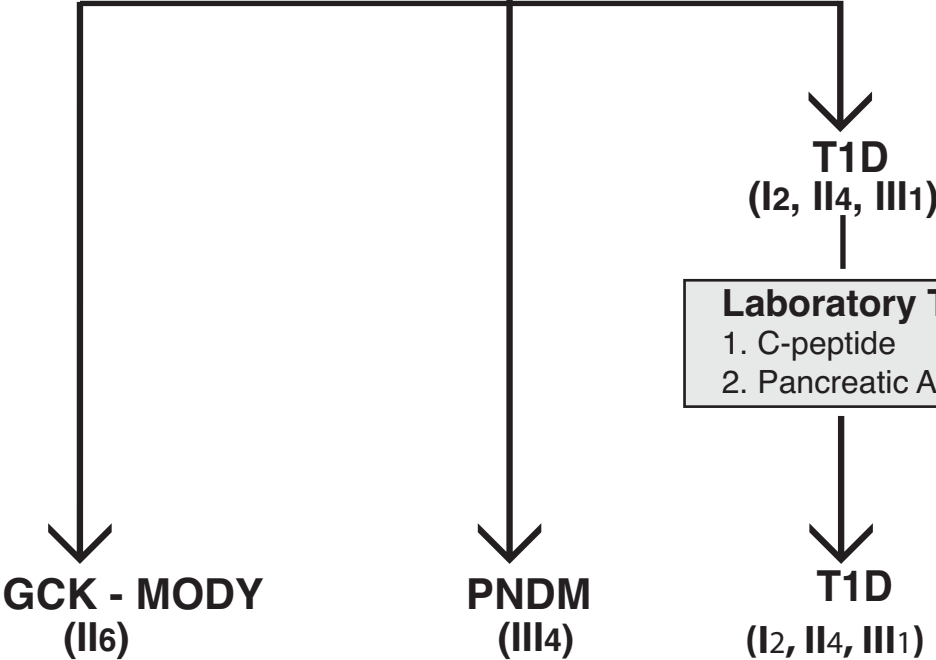

**GCK Screening**

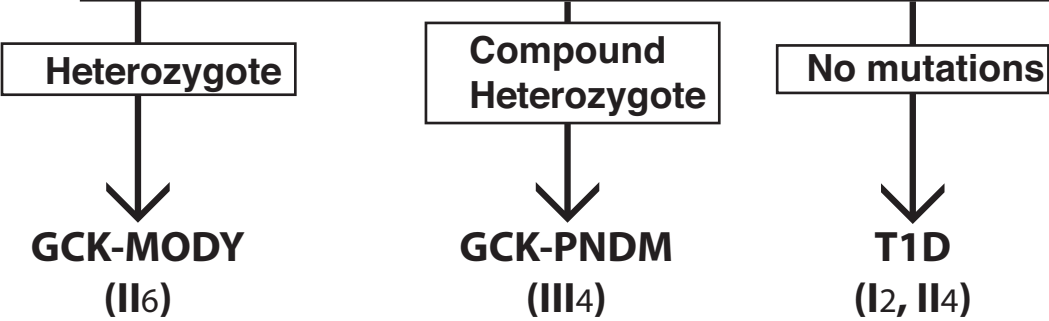

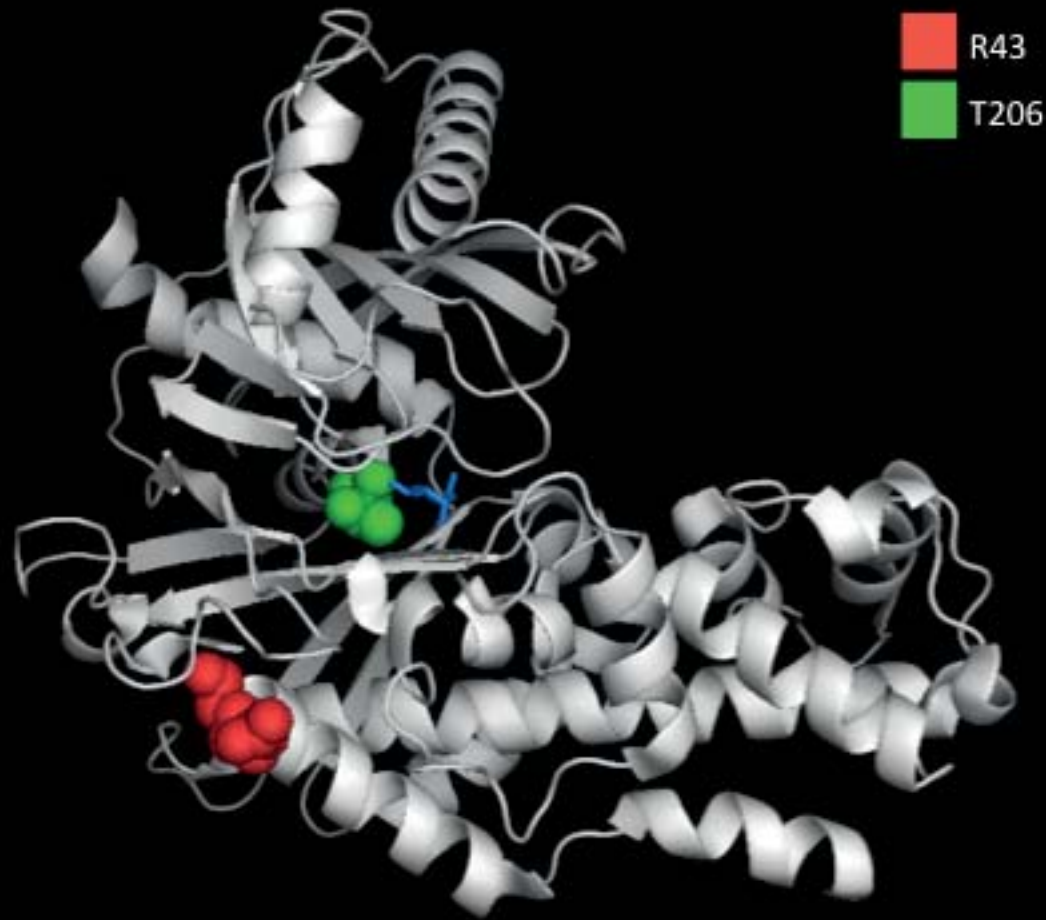

Supplement: NIHMS60540-supplement-Online_Supplementary_Information.pdf [file NIHMS60540-supplement-Online_Supplementary_Information.pdf]
